# Supplementary material
Source: publisher figshare collection journal article supplement (https://karger.figshare.com/articles/dataset/_/5129224)

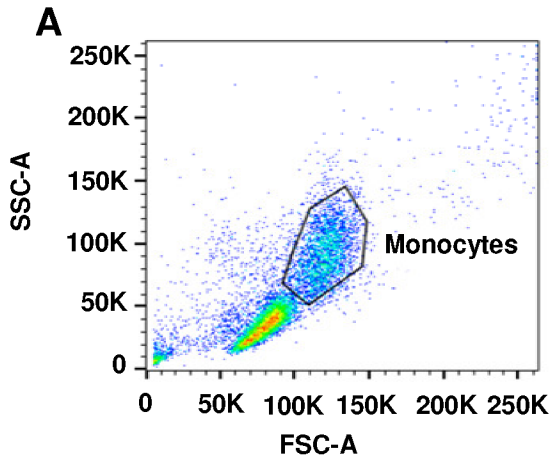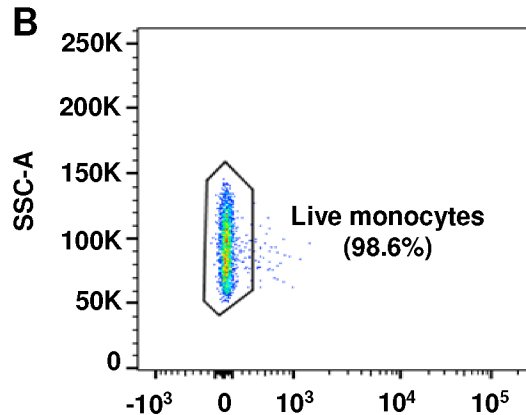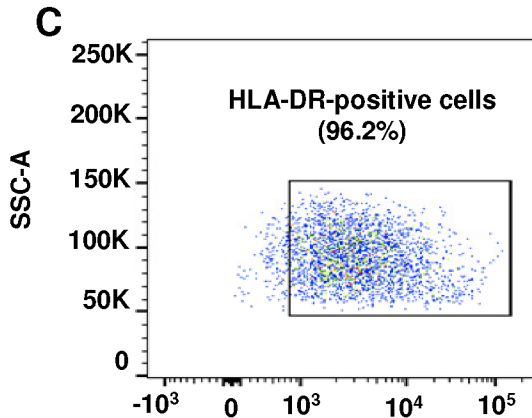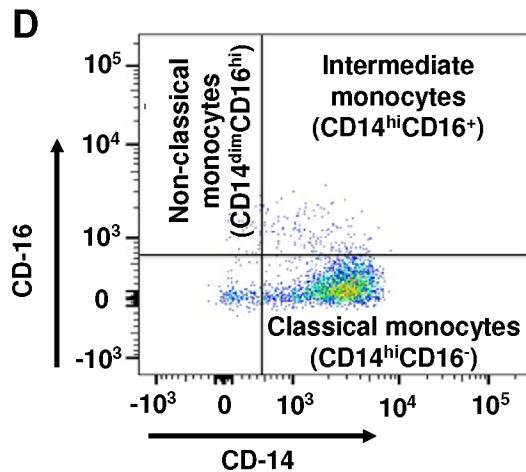

**A**

Classical monocytes

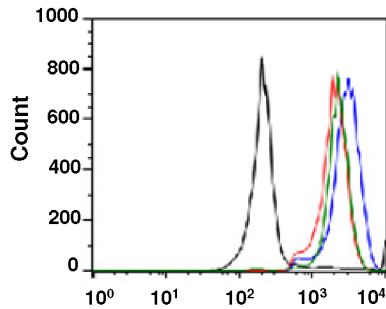

Intermediate monocytes

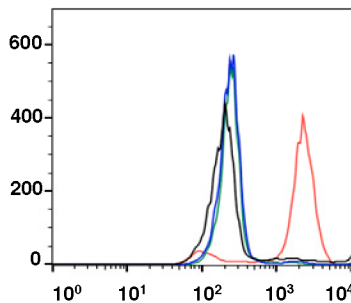

Non-classical monocytes

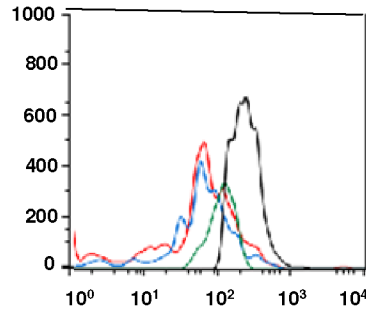**B**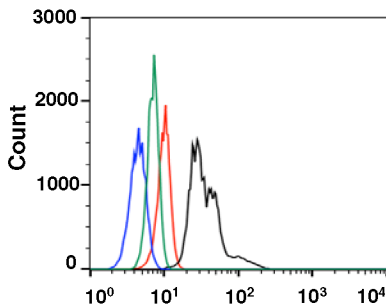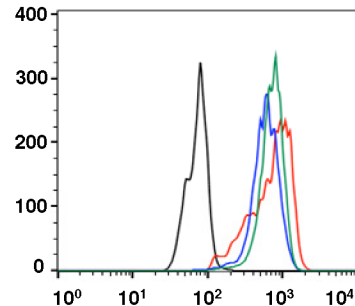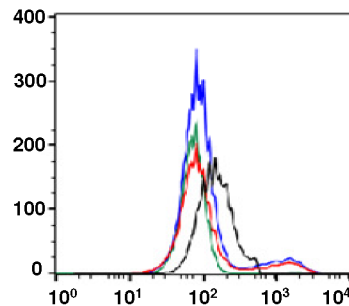

Supplement: Supplementary file 1 [file 1]
